# Supplementary material for: Fluorescent nanocomposites based on gold nanoclusters for metal ion detection and white light emitting diodes
Source: Royal Society of Chemistry journal article supplement (doi:10.1039/d0nr09141c), 2021-01-01
Supplement: d0nr09141c1.pdf [file d0nr09141c1.pdf]

## Supporting Information

# Fluorescent Nanocomposites Based on Gold Nanoclusters for Metal Ion Detection and White Light Emitting Diode

Yongjie Zhang,<sup>a, b</sup> Ning Feng,<sup>a</sup> Shujin Zhou,<sup>a</sup> Xia Xin<sup>a\*</sup>

<sup>a</sup> *Key Laboratory of Colloid and Interface Chemistry, Ministry of Education, School of Chemistry and Chemical Engineering, Shandong University, Jinan, 250100, China*

<sup>b</sup> *School of Chemical Engineering and Technology, Collaborative Innovation Center of Chemical Science and Chemical Engineering (Tianjin), Tianjin University, Tianjin, 300072, China*

---

\*Author to whom correspondence should be addressed, E-mail: [xinx@sdu.edu.cn](mailto:xinx@sdu.edu.cn)

Phone: +86-531-88363597.

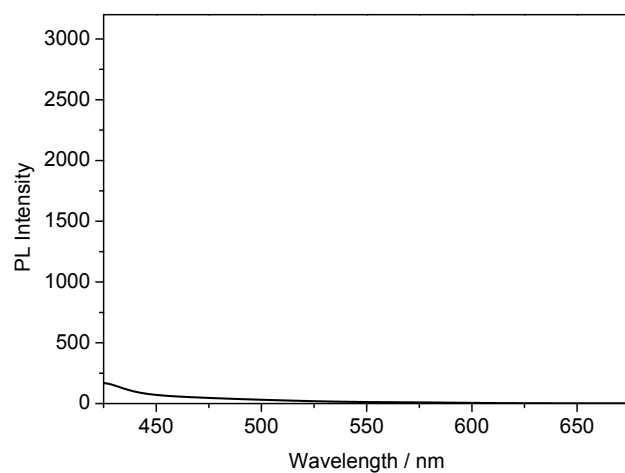

**Figure S1.** PL spectra of MPA-AuNCs solution.

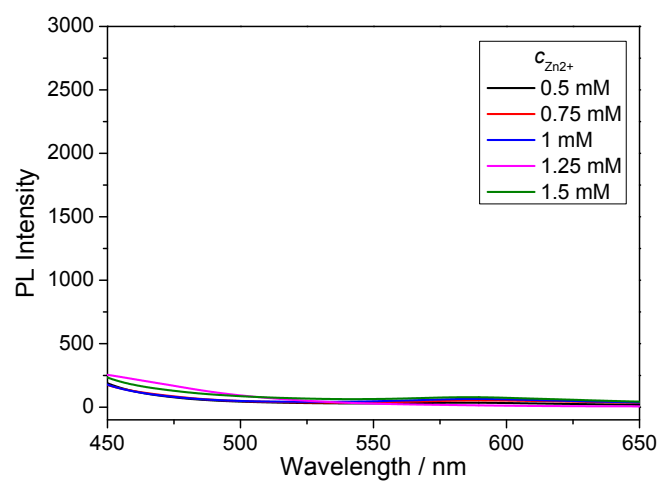

**Figure S2.** PL spectra of MPA-AuNCs solution with addition of different concentrations of Zn<sup>2+</sup>.

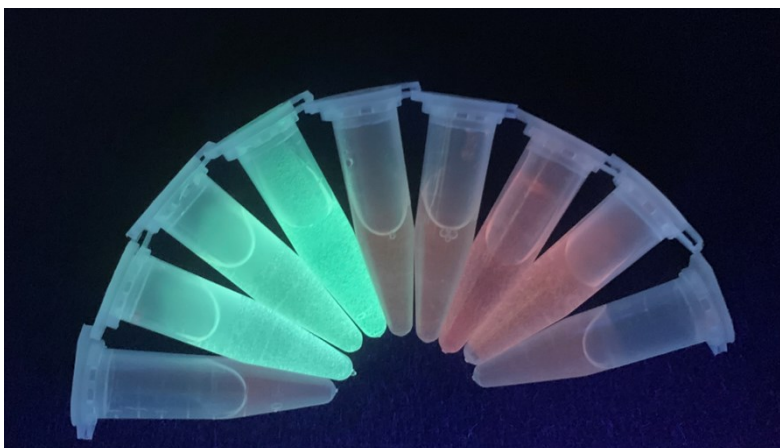

**Figure S3.** Photographs of the MPA-AuNCs under 365 nm UV light with addition of 2M-IM ( $c_{2\text{M-IM}} = 6 \text{ mM}$ ) and different concentrations of  $\text{Zn}^{2+}$  (left to right:  $c_{\text{Zn}^{2+}} = 3, 2.5, 2.25, 2, 1.75, 1.5, 1.25, 1, 0.5 \text{ mM}$ ).

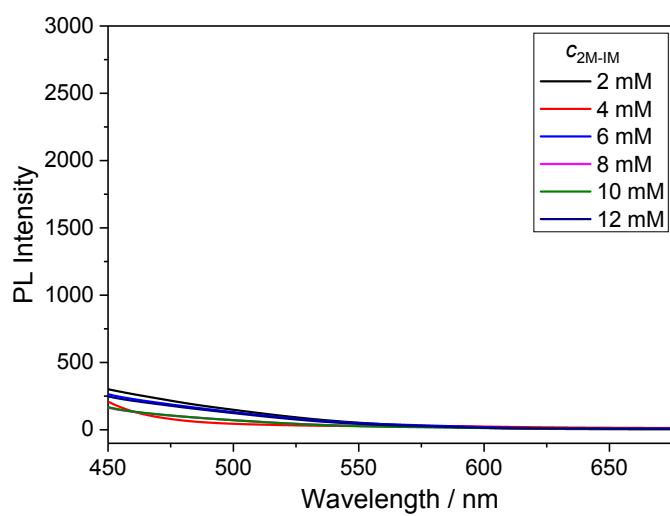

**Figure S4.** PL spectra of MPA-AuNCs solution with addition of different concentrations of 2M-IM.

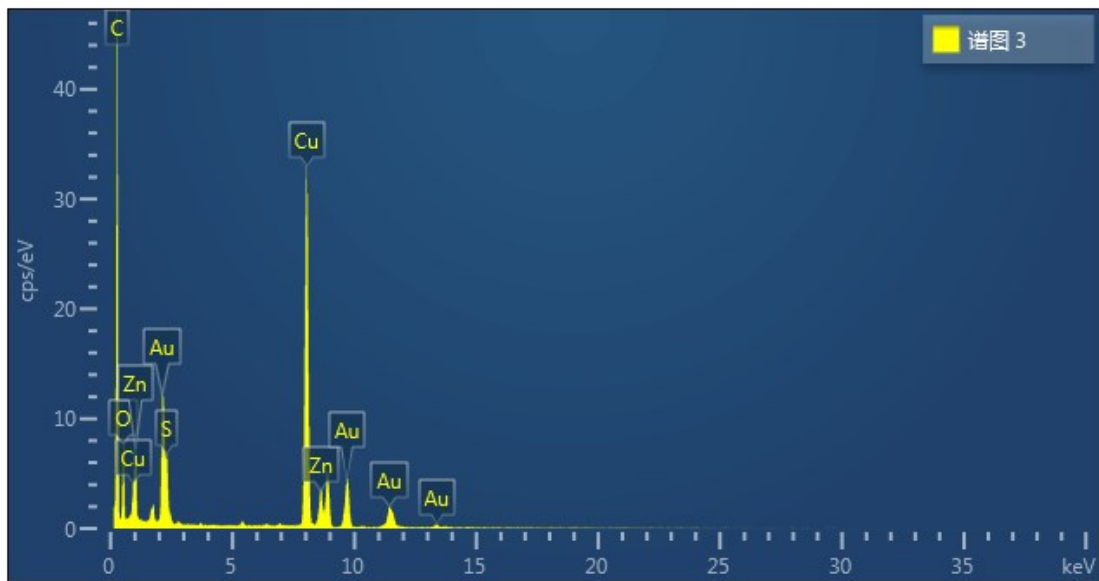

**Figure S5.** EDS of AuNCs@ZnS QDs.

**Table S1.** Elemental contents of AuNCs@ZnS QDs.

| element         | wt%    | atomic % |
|-----------------|--------|----------|
| <b>C</b>        | 41.73  | 77.20    |
| <b>O</b>        | 4.97   | 6.91     |
| <b>S</b>        | 2.65   | 1.83     |
| <b>Cu</b>       | 32.22  | 11.27    |
| <b>Zn</b>       | 3.14   | 1.07     |
| <b>Au</b>       | 15.28  | 1.72     |
| <b>summary:</b> | 100.00 | 100.00   |

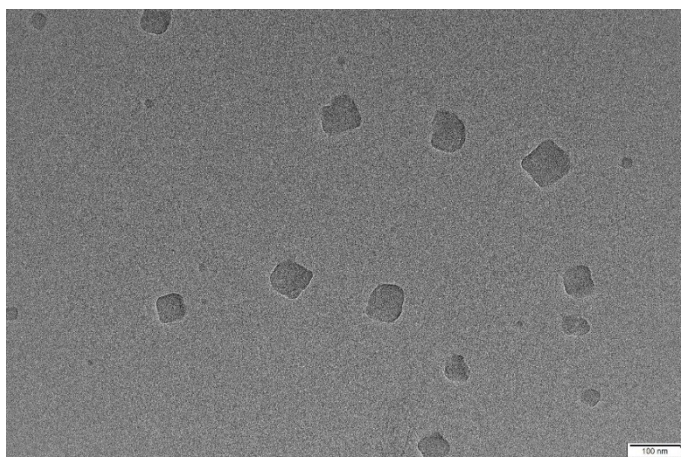

**Figure S6.** HR-TEM image of ZIF-8 ( $c_{\text{Zn}^{2+}}=1$  mM,  $c_{2\text{M-IM}}=6$  mM).

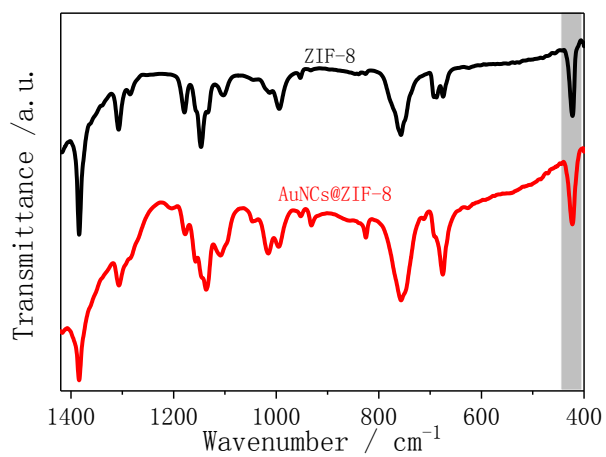

**Figure S7.** FT-IR spectra of ZIF-8 and AuNCs@ZIF-8.

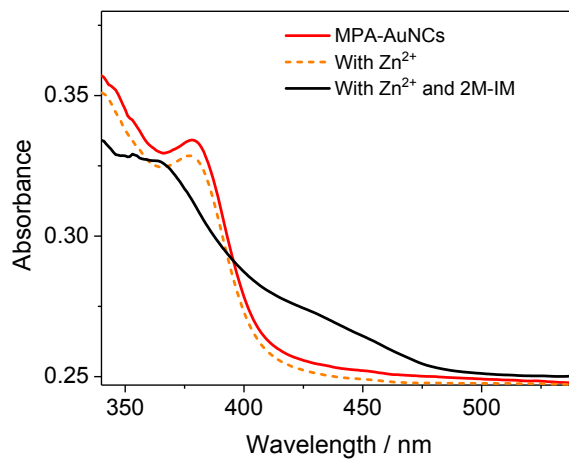

**Figure S8.** UV-vis absorption spectra of MPA-AuNCs and that with addition of  $\text{Zn}^{2+}$ . The black line displays the UV-vis spectrum of MPA-AuNCs instantly after addition of  $\text{Zn}^{2+}$  and 2M-IM.

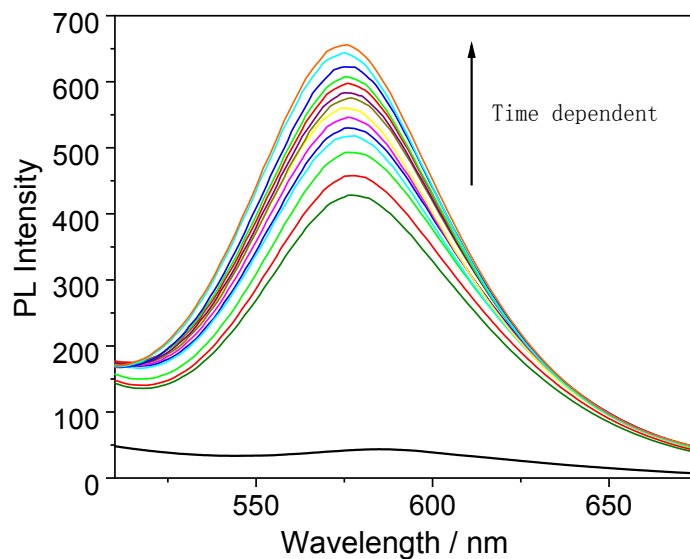

**Figure S9.** Time-dependent PL spectra ( $\lambda_{\text{Ex}} = 365 \text{ nm}$ ) of MPA-AuNCs after addition of  $1 \text{ mM Zn}^{2+}$  and  $6 \text{ mM 2M-IM}$ .

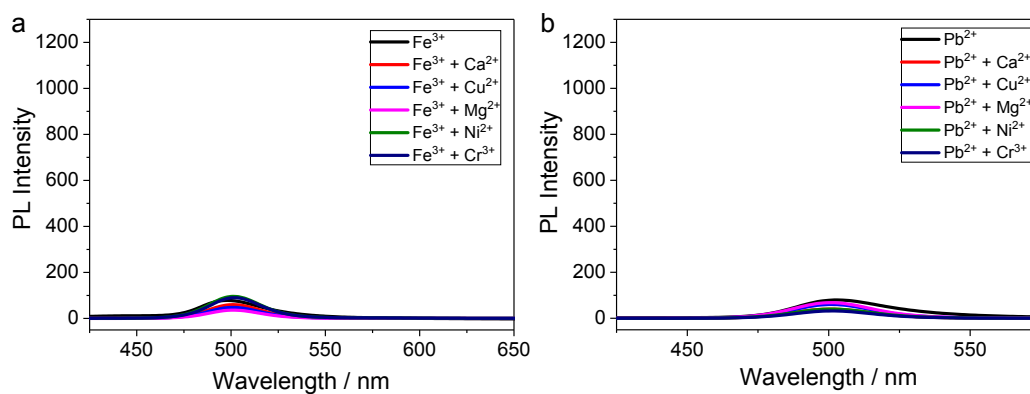

**Figure S10.** PL spectra ( $\lambda_{\text{Ex}} = 365 \text{ nm}$ ) of AuNCs@ZnS QDs with addition of (a)  $\text{Fe}^{3+}$  ( $150 \mu\text{M}$ ) and (b)  $\text{Pb}^{2+}$  ( $150 \mu\text{M}$ ) in the presence of different other metal ions ( $c = 150 \mu\text{M}$ ).

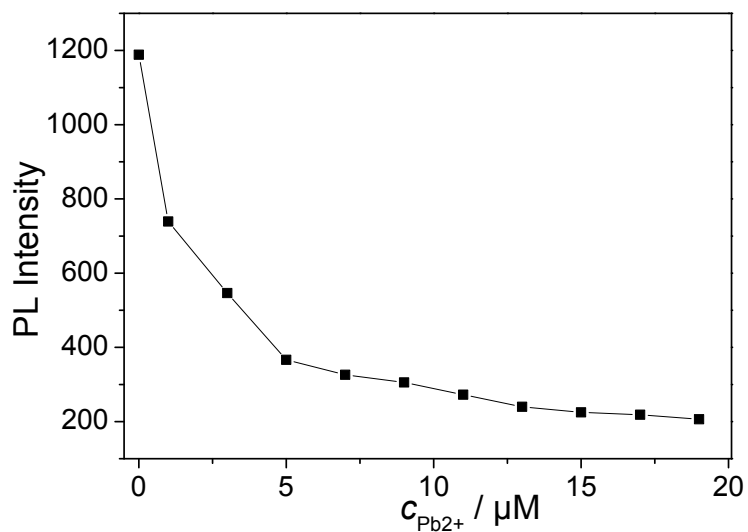

**Figure S11.** Change of PL intensity of AuNCs@ZnS with addition of increasing amount of  $\text{Pb}^{2+}$ .

**Table S2.** Limit of detection of AuNCs@ZnS for  $\text{Fe}^{3+}$  and  $\text{Pb}^{2+}$  in comparison with other previously reported fluorimetric chemical sensors

| Limit of detection ( $\mu\text{M}$ ) | Selectivity      | reference |
|--------------------------------------|------------------|-----------|
| 38                                   | $\text{Fe}^{3+}$ | 1         |
| 19                                   | $\text{Fe}^{3+}$ | 2         |
| 49                                   | $\text{Fe}^{3+}$ | 3         |
| 24.8                                 | $\text{Fe}^{3+}$ | 4         |
| 5.37                                 | $\text{Fe}^{3+}$ | This work |
| 3.3                                  | $\text{Pb}^{2+}$ | 5         |
| 0.8                                  | $\text{Pb}^{2+}$ | 6         |
| 1.5                                  | $\text{Pb}^{2+}$ | 7         |
| 0.25                                 | $\text{Pb}^{2+}$ | 8         |
| 0.26                                 | $\text{Pb}^{2+}$ | This work |

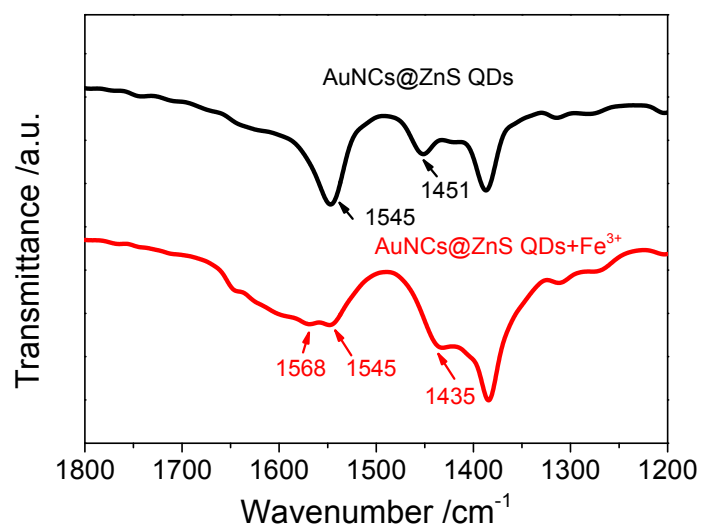

**Figure S12.** FT-IR spectra of AuNCs@ZnS QDs and AuNCs@ZnS QDs/Fe<sup>3+</sup>.

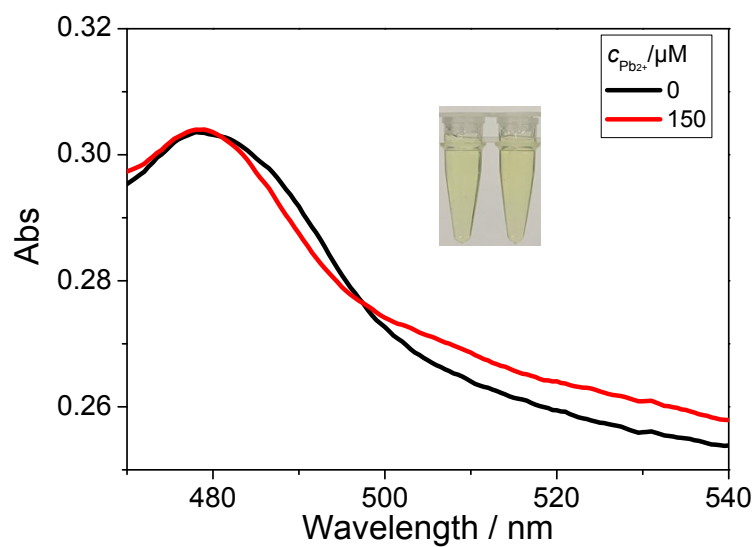

**Figure S13.** UV-vis absorption spectra of AuNCs@ZnS and that with addition of 150 μM Pb<sup>2+</sup>. Inset: photographs of AuNCs@ZnS (left) and that with addition of 150 μM Pb<sup>2+</sup> (right).



## References

- [1] Ma, TT, Zhao, X, Matsuo, Y, Song, J, Zhao, R, Faheem, M, Chen, M, Zhang, YF, Tian, YY, Zhu, GS. Fluorescein-based fluorescent porous aromatic framework for  $\text{Fe}^{3+}$  detection with high sensitivity, *J. Mater. Chem. C* 2019, 7, 2327-2332.
- [2] Bardhan, S, Roy, S, Chanda, D, Ghosh, S, Mondal, D, Das, S, Das, S. Nitrogenous carbon dot decorated natural microcline: an ameliorative dual fluorometric probe for  $\text{Fe}^{3+}$  and  $\text{Cr}^{6+}$  detection. *Dalton Trans.* 2020, 49, 10554-10566.
- [3] Yao, J, Liu, Y, Yang, L, Dou, A, Hou, C, Xu, Q, Huang, B, Zhu, A. Novel alkaline earth metal-organic frameworks with thiophene groups for selective detection of  $\text{Fe}^{3+}$ . *CrystEngComm*, 2020, 22, 5970-5979.
- [4] Shen, J, Wang, Z, Sun, D, Liu, G, Yuan, S. Mohamedally Kurmoob Xin, X. Self-assembly of water-soluble silver nanoclusters: superstructure formation and morphological evolution. *Nanoscale*, 2017, 9, 19191-19200.
- [5] Luan, W, Yang, H, Wan, Z, Yuan, B, Yu, X, Tu, S. Mercaptopropionic acid capped CdSe/ZnS quantum dots as fluorescence probe for lead (II). *J Nanopart Res* 2012, 14, 762.
- [6] Liu, T, Wan, X, Yao, Y. Dual sensitive and selective sensor for  $\text{Pb}^{2+}$  and  $\text{Al}^{3+}$  with distinctive fluorescence response. *Sensors and Actuators B* 2018, 254, 1094-1100.
- [7] Ma, L, Li, H, Wu, Y. A pyrene-containing fluorescent sensor with high selectivity for lead (II) ion in water with dual illustration of ground-state dimer. *Sensors and Actuators B* 2009, 143, 25-29.
- [8] M. L, Jiang, X, Wu, H, Lu, H, Li, H, Xu, H, Zang, S, Mak, T. Dual functional probe for “turn-on” fluorescence response of  $\text{Pb}^{2+}$  and colorimetric detection of  $\text{Cu}^{2+}$  based on a rhodamine derivative in aqueous media. *Dalton Trans.*, 2015, 44, 17326-17334.
